# Supplementary material
Source: Springer Nature journal article supplement (https://www.springermedizin.de/resource/supplementary/12950_2011_248_MOESM7_ESM.pdf/9558280)
Supplement: MOESM7 [file 9558280]

| Cohort              | Day | Range                           | Average $\pm$ SD                | <i>P</i> value* |                  |   |                  |
|---------------------|-----|---------------------------------|---------------------------------|-----------------|------------------|---|------------------|
|                     |     | ( $^{19}\text{F}$ x $10^{19}$ ) | ( $^{19}\text{F}$ x $10^{19}$ ) |                 |                  |   |                  |
| <i>Vehicle</i>      | 15  | 0.14 to 11.2                    | 5.17 $\pm$ 4.55                 | }               | 5.43 x $10^{-6}$ | } | 1.93 x $10^{-6}$ |
|                     | 22  | 6.59 to 19.2                    | 11.9 $\pm$ 4.71                 |                 |                  |   |                  |
|                     | 29  | 12.8 to 21.9                    | 17.3 $\pm$ 3.82                 |                 |                  |   |                  |
| <i>Prednisolone</i> | 15  | 0.17 to 12.1                    | 4.57 $\pm$ 4.86                 | }               | NS               | } | NS               |
|                     | 22  | 0.70 to 13.1                    | 4.85 $\pm$ 4.63                 |                 |                  |   |                  |
|                     | 29  | 0.91 to 13.8                    | 5.92 $\pm$ 5.56                 |                 |                  |   |                  |
